# Supplementary material for: Anti-Inflammatory Effects of Ellagic Acid on Keratinocytes via MAPK and STAT Pathways
Source: MDPI journal article supplement (doi:10.3390/ijms22031277), 2021-01-28
Supplement: s1 [file s1]

S1

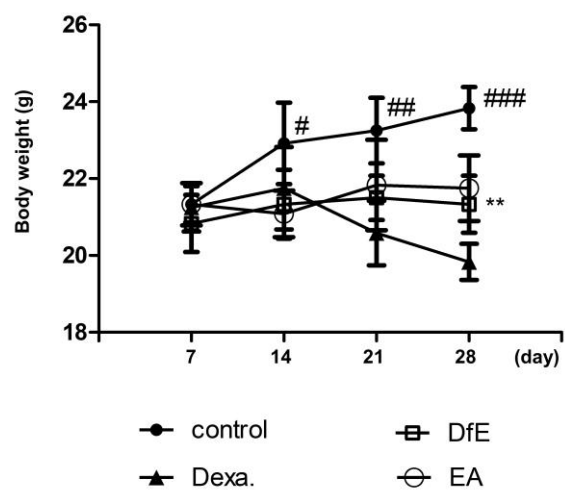

**Figure S1.** Effect of EA on body weight in DfE-induced AD-NC/Nga mice ( $n = 8$ ). Body weights were measured every week. Each group consisted of six mice.  $**p < 0.01$  versus the only DfE-treated group,  $^{\#}p < 0.05$ ,  $^{\#\#}p < 0.01$ , and  $^{\#\#\#}p < 0.001$  versus the control group by ANOVA and Dunnett's *post-hoc* test.

S2

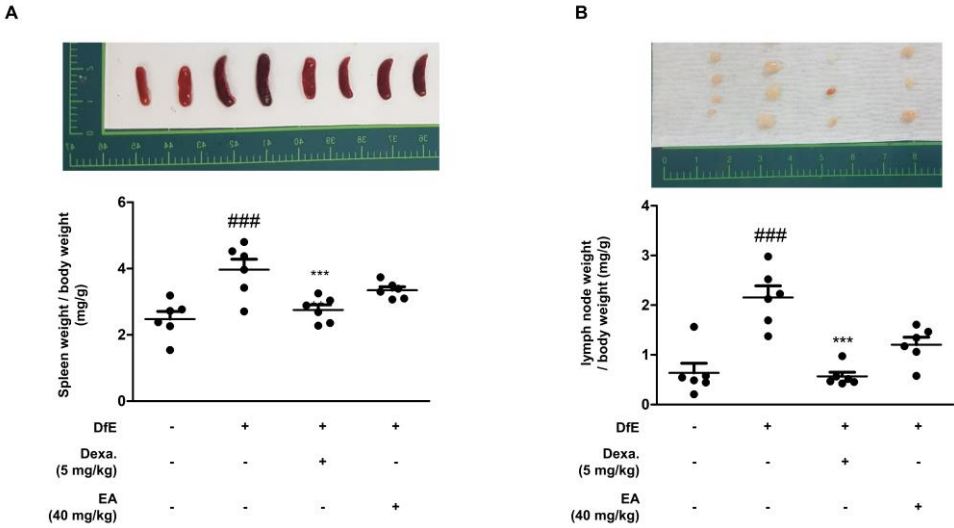

**Figure S2.** Effect of EA on immune organ weight in DfE-induced AD-NC/Nga mice. (A) The spleen was isolated from each mouse and (B) representative lymph nodes were detached from the groin and axilla ( $n = 6$ ).  $***p < 0.001$  versus the only DfE-treated group,  $^{\#\#\#}p < 0.001$  versus the control group by ANOVA and Dunnett's *post-hoc* test.
